# Supplementary material
Source: HighWire-hosted journal article supplement (http://tech.snmjournals.org/highwire/filestream/8655/field_highwire_adjunct_files/0/153668_Supplemental_Data.pdf)

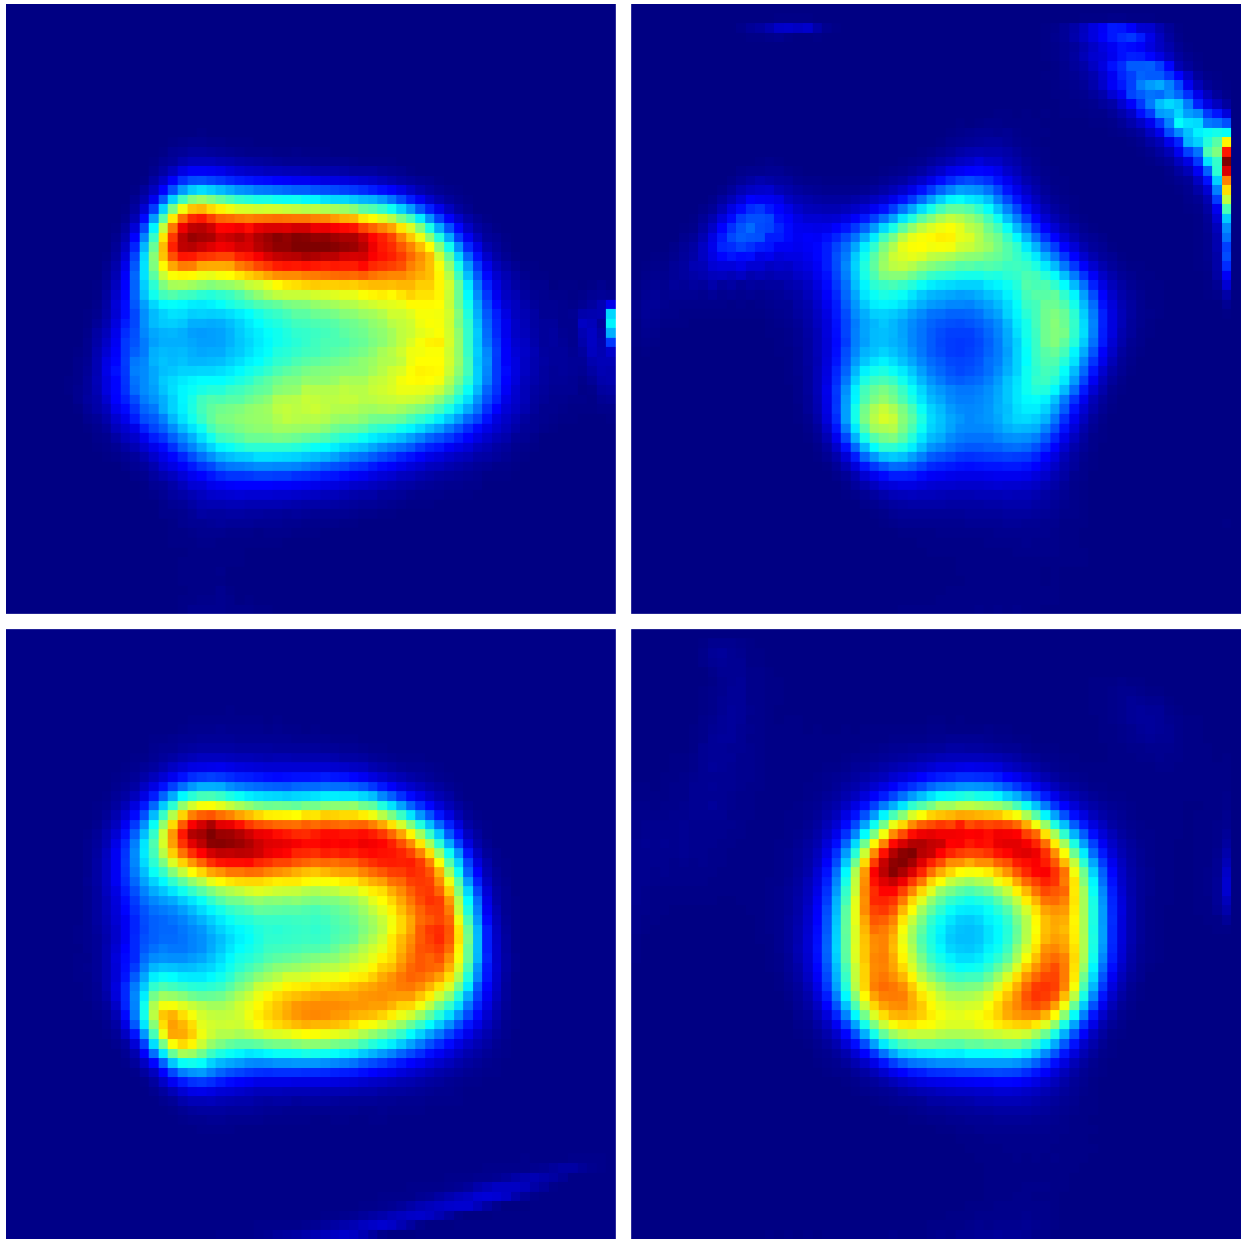

Color version of Figure 13.

Supplement: 153668_Supplemental_Data.pdf [file 153668_Supplemental_Data.pdf]
